# Supplementary material
Source: PubMed Central journal article supplement (PMC2808446)
Supplement: NIHMS141345-supplement-1.pdf [file NIHMS141345-supplement-1.pdf]

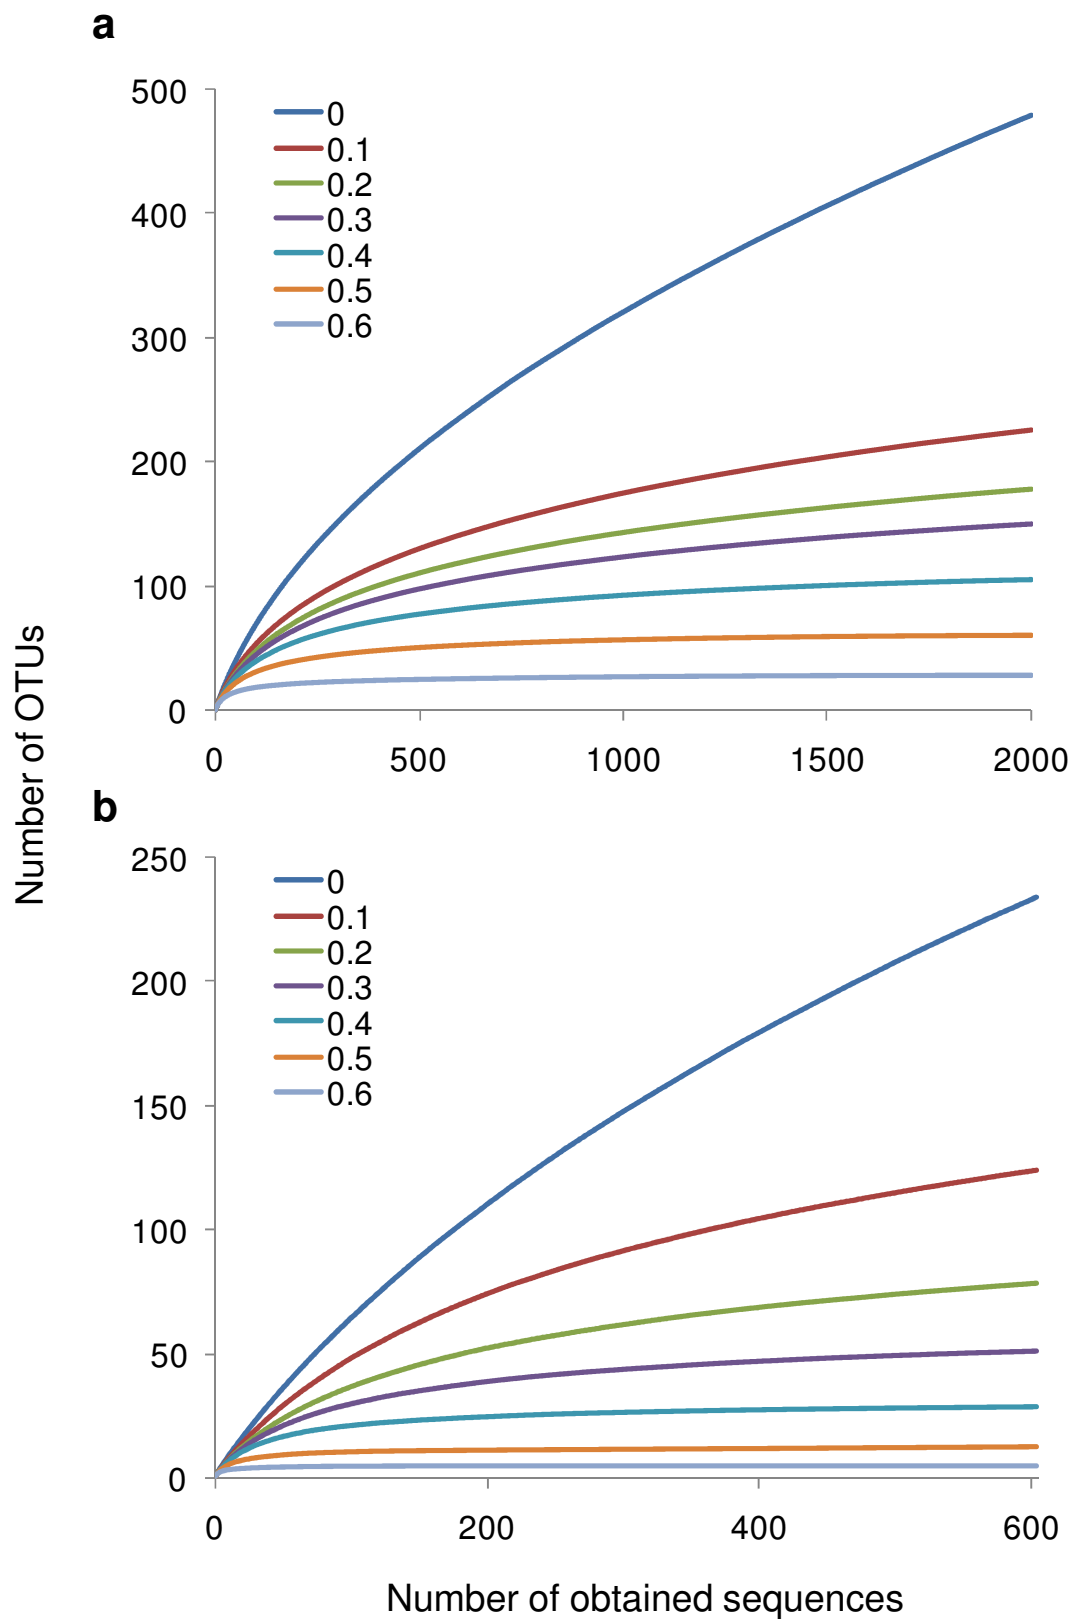

Figure S1 Rarefaction curve at 0, 0.1, 0.2, 0.3, 0.4, 0.5 and 0.6 distances by the Complete Linkage Clustering for (a) BPHD-f3 and (b) BPHD-r1 of obtained sequences.
