# Supplementary material
Source: PubMed Central journal article supplement (PMC2808446)
Supplement: NIHMS141345-supplement-3.pdf [file NIHMS141345-supplement-3.pdf]

Table S1 Reference sequences in each cluster.

| BPHD-f3 | BPHD-r1 | Protein IDs                                                                                                                                                                                                                                                                                                                                                                                                                                                                                                                                                                                                                               | Substrates                                       |
|---------|---------|-------------------------------------------------------------------------------------------------------------------------------------------------------------------------------------------------------------------------------------------------------------------------------------------------------------------------------------------------------------------------------------------------------------------------------------------------------------------------------------------------------------------------------------------------------------------------------------------------------------------------------------------|--------------------------------------------------|
| F23     | R4      | A1TDE1,O69363                                                                                                                                                                                                                                                                                                                                                                                                                                                                                                                                                                                                                             |                                                  |
| F34     |         | A3KCY4,A3KCZ6,A3KD13,Q208M6                                                                                                                                                                                                                                                                                                                                                                                                                                                                                                                                                                                                               |                                                  |
|         | R8      | A1SEH3                                                                                                                                                                                                                                                                                                                                                                                                                                                                                                                                                                                                                                    |                                                  |
| F24     | R5      | Q07944,P0C618,A5W4F2,Q49KD8,Q798Y6,A5HFU4,P72256,Q53122,Q588I9,Q8VQU6,A7XK01,O69795,A6NA94,Q24676,Q52383,Q52757,Q53086,Q79EP8,Q52438,Q46372,O86136,Q2VLC4,Q84EP4,O51848,P95566,Q51743,Q9K4S4,Q9R956,Q8KZP9,P37333,Q9RHA5,O50578,Q52028,Q9AEY5,A1VUW1,Q46155,Q75W73                                                                                                                                                                                                                                                                                                                                                                        | Benzene, Toluene, Biphenyl, Isopropylbenzene     |
| F26     |         | A2TC55,Q83VJ3,A4XDS7,O85966,Q6REQ7,Q934B6,Q75WN5,Q8GJF2,Q4IUC5,Q47B05                                                                                                                                                                                                                                                                                                                                                                                                                                                                                                                                                                     |                                                  |
| F29     |         | P0ABR6,P0ABR5,A8A344,Q0T1Y1,Q31XV2,Q3YZ15,Q8FN43,Q7N4W0                                                                                                                                                                                                                                                                                                                                                                                                                                                                                                                                                                                   |                                                  |
| F30     |         | Q8L0Y4                                                                                                                                                                                                                                                                                                                                                                                                                                                                                                                                                                                                                                    |                                                  |
| F32     |         | A3JSP3                                                                                                                                                                                                                                                                                                                                                                                                                                                                                                                                                                                                                                    |                                                  |
|         |         |                                                                                                                                                                                                                                                                                                                                                                                                                                                                                                                                                                                                                                           | A2TC87,Q65AT1,A4XDY3,O85843,Q1HCP6,Q7WUA0,       |
| F35     | R7      | Q51494,Q9ZI73,P0A110,P0A111,O07824,Q1XGM0,Q938R9,Q0KK81,Q79P84,Q7B7H3,Q7WQQ3,Q83K39,Q6XUJ7,Q52142,Q52382,Q3S4D0,Q9L5D2,A1WAE6,P95564,Q8RTL4,Q45695,Q8VUD4,Q6BDD0,Q9ZHH3,Q93NA8,Q9WXG8,A2TC57,Q83VJ1,A4XDS5,O85964                                                                                                                                                                                                                                                                                                                                                                                                                         | Naphthalene                                      |
| F27     |         | A5VGW0,Q86899                                                                                                                                                                                                                                                                                                                                                                                                                                                                                                                                                                                                                             |                                                  |
| F30     |         | Q85283                                                                                                                                                                                                                                                                                                                                                                                                                                                                                                                                                                                                                                    |                                                  |
| F36     |         | Q4J778                                                                                                                                                                                                                                                                                                                                                                                                                                                                                                                                                                                                                                    |                                                  |
| F37     |         | A3Q490                                                                                                                                                                                                                                                                                                                                                                                                                                                                                                                                                                                                                                    |                                                  |
|         |         | R9                                                                                                                                                                                                                                                                                                                                                                                                                                                                                                                                                                                                                                        | A3LC83,A3LCA8,Q9X4W9,Q13HF5,Q1NH89,A5V4P1,Q86909 |
| F25     | R10     | A1T2I3,A1UDK4,A1UQA4,A3PX19,A4T3I3,A4T5D7,Q1B0P3,Q1BBE4                                                                                                                                                                                                                                                                                                                                                                                                                                                                                                                                                                                   |                                                  |
| F28     |         | A8C9M7,Q8L182,Q93UV3,Q2WGA2                                                                                                                                                                                                                                                                                                                                                                                                                                                                                                                                                                                                               |                                                  |
| F38     |         | Q0KJ72                                                                                                                                                                                                                                                                                                                                                                                                                                                                                                                                                                                                                                    |                                                  |
| F31     |         | A5VEA4,Q86913                                                                                                                                                                                                                                                                                                                                                                                                                                                                                                                                                                                                                             |                                                  |
| F33     | R6      | Q88I40                                                                                                                                                                                                                                                                                                                                                                                                                                                                                                                                                                                                                                    | Benzoate                                         |
|         |         | A0AWL3,A1T2H7,A1UDJ3,A1UQB3,A3PX13,A4T3H4,Q1B0N4,Q1BBF1,A0AWN0,Q9AGK6,A3Q4B5,Q8GI63,A1T2B0,A1UDE6,A3PWW6,A4T3D5,A4T578,Q1BBK1,Q6UP13,A4ZXZ3,Q0RWD5,Q6REL0,Q93RE4,Q2VMX5,A0QIF3,Q73WC6                                                                                                                                                                                                                                                                                                                                                                                                                                                     |                                                  |
| F39     | R11     | A0FKG1,A1UDL1,A2SW63,A3PX26,A4T3J0,Q1BBD5,Q3Y541,Q84EU7,A1T2J0,Q0PET4,Q9X3R9,Q2W6G94,Q6TML2,Q6TMM0,Q76BV8,Q9X593,A1T2G9,A1UDI5,A1UPR3,A1UQC1,A3PX05,A4T3G6,Q1B0M6,Q1BBF8,Q2FBP3,Q45RF7,Q7DJF2,Q9R6Z7,A1T2D3,A1UDG3,A1UPQ0,A2SW54,A3PWY3,A3PYP6,A4T3F8,A4T599,Q199A4,Q199A5,Q1BBI2,Q3Y534,Q6H2Y8,Q6H2Z0,Q6H2Z2,Q716X0,Q716X6,Q8GFY7,Q8GFY9,Q8GFZ1,Q9KHU1,Q84EU3,Q6L6S9,Q7WZF1                                                                                                                                                                                                                                                              |                                                  |
| F40     |         | A0AY82,A2W0L6,Q392K9,Q0B4M1,Q13YH6,Q2T8H1,A4QGD4,Q5KRD5,Q0SCT9,Q5YVU9,A0P0I5,A3K7A2,A6VWC1,A4XFG2,A5V495,Q2IT72,A5VE12                                                                                                                                                                                                                                                                                                                                                                                                                                                                                                                    |                                                  |
| F41     | R12     | A0P0E5,Q5LTG3,Q28SQ2,A4JM86,A1K6Z5,A5EGP8,Q8Y0F4,Q5LL94,A1WLB4,A0Z5J9,A1WLA6                                                                                                                                                                                                                                                                                                                                                                                                                                                                                                                                                              |                                                  |
| F42     | R13     | A1K4I5,Q9AQN3,A1WJE0,Q39N48,A5V7G8,A5V6H8                                                                                                                                                                                                                                                                                                                                                                                                                                                                                                                                                                                                 |                                                  |
| F43     |         | A5VDZ8                                                                                                                                                                                                                                                                                                                                                                                                                                                                                                                                                                                                                                    |                                                  |
| F44     |         | Q7W4H2,Q7WZF5                                                                                                                                                                                                                                                                                                                                                                                                                                                                                                                                                                                                                             |                                                  |
| F45     |         | A0QMR4,Q7VWV0,Q7W6S4,Q7WHQ8,A1E031                                                                                                                                                                                                                                                                                                                                                                                                                                                                                                                                                                                                        |                                                  |
| F46     | R14     | A0QDY3,A0QFW5,A3Q3W8,Q0RKB2                                                                                                                                                                                                                                                                                                                                                                                                                                                                                                                                                                                                               |                                                  |
| F47     |         | A5V754,A5W4G8,Q51974,Q143Q7,Q9XDW6                                                                                                                                                                                                                                                                                                                                                                                                                                                                                                                                                                                                        | Benzoate                                         |
| F48     | R15     | A3KTM9,A3L8B9,Q02LN0,Q7WPF6                                                                                                                                                                                                                                                                                                                                                                                                                                                                                                                                                                                                               |                                                  |
| F49     |         | Q2PQV9                                                                                                                                                                                                                                                                                                                                                                                                                                                                                                                                                                                                                                    |                                                  |
| F50     | R16     | A0AYN6,A2W071,A2WI08,A4JLI9,Q0B474,Q1BLN6,Q84BZ3,Q393D0,Q13G02,Q13M42,A1UYC1,A2S0A6,A3MB03,A3NMX8,A3P8D3,A4LFM1,A5J9R9,A5XVQ4,A8ENF2,Q3JJW2,Q6E248,Q63J28,Q2T811,Q13VP5,Q706U5,Q0KJU3,A2TC36,Q83VK6,A4XDU5,O85986,Q7WUA1,Q1MWM5,A0HI75,Q3C1E3,Q5D0X6,Q8GRC1,Q3C1D5,Q0RWE4,Q6REK1,A1RD10,Q13RP6,Q13QJ8,A1WRP6,A2TC29,Q83VL2,A4XDV2,O85993,Q65AS5,Q13VQ0,Q5GRB5,Q93AD8,Q9Z5W0                                                                                                                                                                                                                                                               |                                                  |
| F51     |         | A1K8H8,Q12EV5,A1TII9,A3RZ19,Q91232,A6VYQ3,Q87618,Q5GRC1,Q8GHI9,A1VQ64,Q3S4D3,Q52379,Q45693,Q0KB56,Q46S17,A5VAU0,Q2KXG8,Q7WM02,Q7N7V1,Q0K331,Q46UQ0,Q2L1S3,Q7VS63,Q7W1S6,Q89PT0                                                                                                                                                                                                                                                                                                                                                                                                                                                            |                                                  |
| F52     |         | A1T2D7,A1UDG7,A1UPQ4,A2SW58,A3PWY7,A3PYP2,A4T3G2,Q1BBH8,Q6H2I7,Q716X2,Q13GA9,Q13HX7                                                                                                                                                                                                                                                                                                                                                                                                                                                                                                                                                       |                                                  |
| F53     | R17     |                                                                                                                                                                                                                                                                                                                                                                                                                                                                                                                                                                                                                                           |                                                  |
| F53     | R18     | A1SEW4,P95531,Q58LY9,Q60GF3,Q842F3,Q76KR6,Q44251,Q5FY64,A5EGL0                                                                                                                                                                                                                                                                                                                                                                                                                                                                                                                                                                            | Benzoate                                         |
| F54     | R19     | Q84IK3,Q8GI20,Q9AQM5,                                                                                                                                                                                                                                                                                                                                                                                                                                                                                                                                                                                                                     |                                                  |
| F55     |         | Q51592,Q75ZJ6,Q8VUJ2                                                                                                                                                                                                                                                                                                                                                                                                                                                                                                                                                                                                                      | Benzoate                                         |
| F54     |         | A3KUS0,A3L6Q6,Q79T11,Q05K30,A6V4V0,Q02MW1,O85673,Q3LUW9,Q4KIN7,Q9AQP0,Q2G7Q3                                                                                                                                                                                                                                                                                                                                                                                                                                                                                                                                                              | Benzoate                                         |
| F56     | R20     | P07769,Q687Z6,A3M401,Q7WTI9,A1UYA3,A2S087,A3MAY4,A3NMZ6,A3P8F1,A4LFN8,A5J9Q2,A5XVN8,A8EN6,Q62E63,Q63J13,Q2T826,A1VP43,A3RZX9,Q0KAA7,Q1LDN2,Q46SX9,Q13LK0,Q1QBA5,P23099,Q6PKX0,Q7AXU6,Q84IA4,Q9R9Z6,A3KUS6,Q05K20,A3L6N9,Q02MW7,Q93SR8,A5W3H9,Q49KH5,Q9L7Y5,Q3KDU2,Q8NN09,Q118W8,Q3KBZ6,Q4K9X5,A6V4U4,A4VK50,Q4J3T6,Q47CC3,A7IEE0,A0QTN6,A1UCP5,A3PWD2,Q1BC99,Q8GH63,A4FHX3,A4T5V4,A4QGC4,Q6M355,Q9I0X0,Q9I0W4,Q0SE47,Q932V1,Q93Q80,Q51601,Q9AJR2,A6EWM6,A3W8Q8,A6E2V8,A3XE47,A0KDJ1,Q0B145,Q1BVZ3,Q3C2D0,Q39N75,A2WIX2,A4JR52,Q3C2D4,A7CJH0,Q9AQS4,A1B188,A5V9M6,Q2GAY8,A6T9N2,Q3LUX4,A3JAJ2,A6EXT4,A2TC33,Q83VK9,A4XDU8,O85989,Q9ZQ8GAY5 | Benzoate                                         |
|         |         | -                                                                                                                                                                                                                                                                                                                                                                                                                                                                                                                                                                                                                                         |                                                  |
